# Supplementary material
Source: PubMed Central journal article supplement (PMC3820926)
Supplement: supp_M113.027649_mcp.M113.027649-1.pdf [file supp_M113.027649_mcp.M113.027649-1.pdf]

## **Supplemental material :**

**Supplemental Figure 1. Demonstration of the successful pressure overload with TAB**

**Supplemental Figure 2. Validation and assessment of the quantification strategy**

**Supplemental Figure 3. The CV of casein phosphopeptides in each experiment of Figure 1A**

**Supplemental Figure 4. Correlation analysis between biological replicates**

**Supplemental Figure 5. Kinase recognition motif analysis**

**Supplemental Figure 6. Phosphorylation changes in pathways related to cardiac hypertrophy**

**Supplemental Table I. Identification and quantification results of phosphopeptides  
(as a Excel file)**

**Supplemental Table II. References of signaling pathways of Supplemental Figure 6**

**Supplemental Table III. TAB-phosphoprotein-related abnormal heart phenotypes**

## Supplemental Figure 1

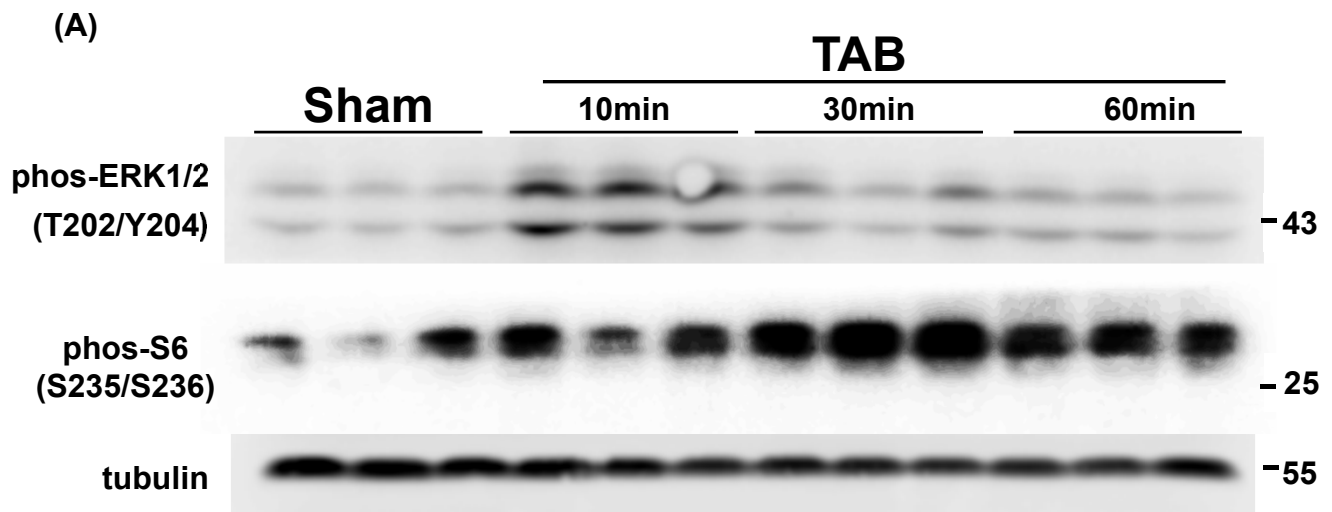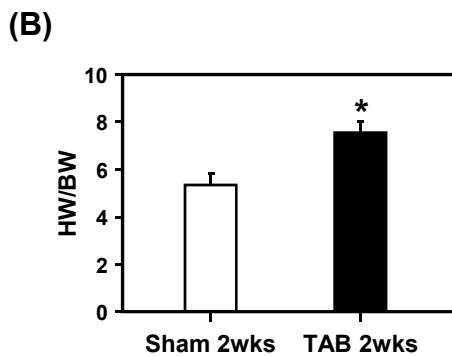

Supplemental Figure 1. A, Western blot analysis of phosphorylated ERK1/2 and S6 from left ventricle tissues of mouse hearts with acute pressure overload. The position of molecular weight marker is showed to the right of immunoblot. B, Quantification of ratio of heart weight to body weight (HW/BW) in mice that underwent sham operation or transverse aortic banding (TAB) for 2 weeks.

## Supplemental Figure 2

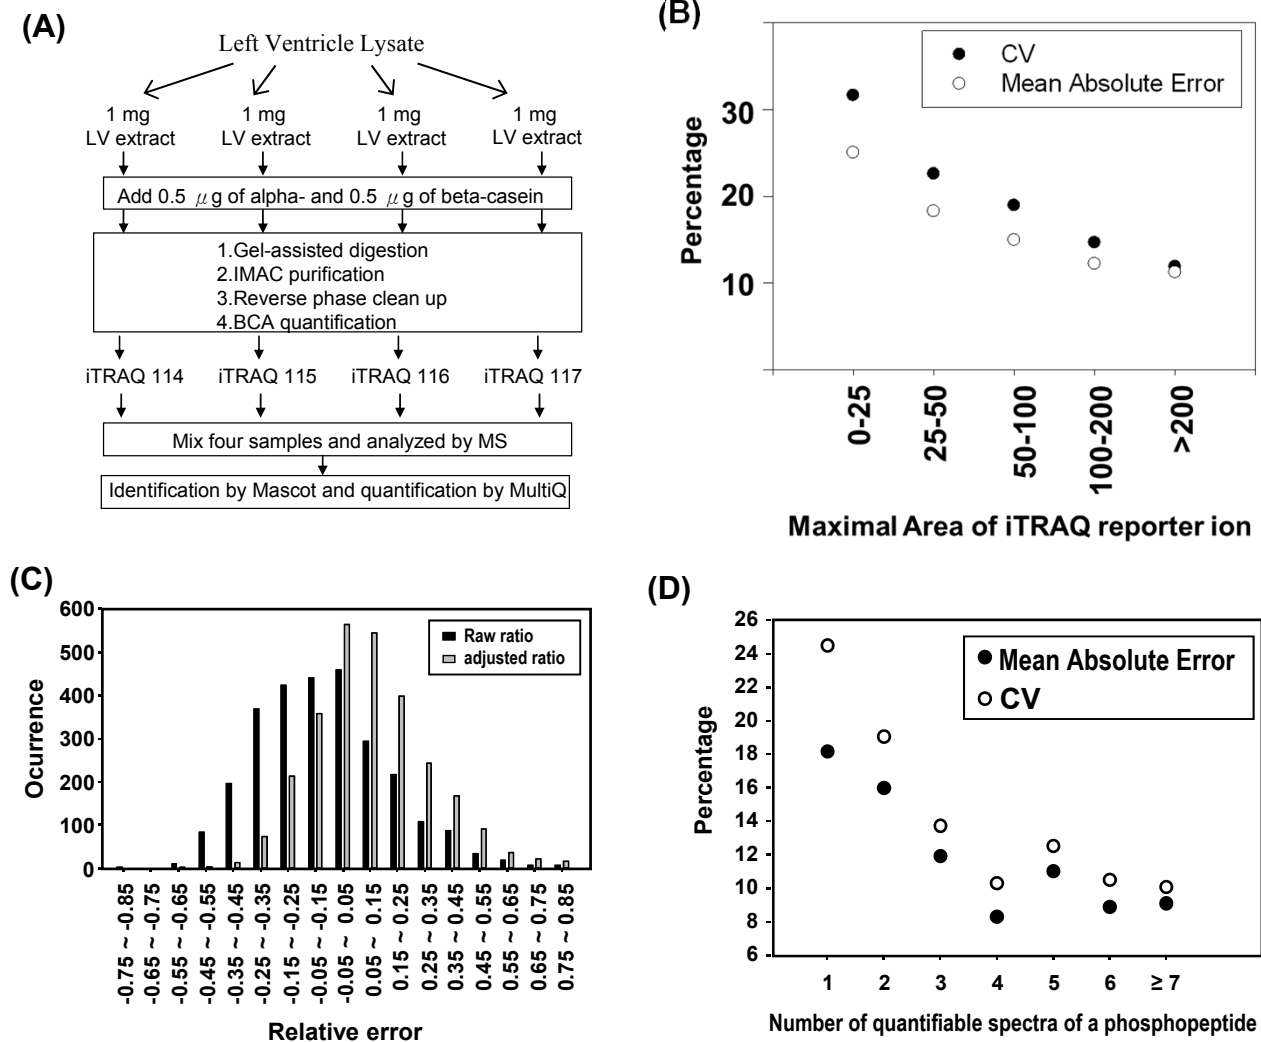

**Supplemental Figure 2. Validation and assessment of the quantification strategy by a 1:1 experiment. A, Experimental scheme used for validation of quantification strategy. The same left ventricle lysates were used. The same amount of standard phosphoproteins and bovine  $\alpha$  and  $\beta$  caseins was added to each 1 mg lysates. B, Quantification accuracy and reproducibility of phosphopeptides by peak area of iTRAQ reporter ion according to mean absolute error (MAE) and coefficient of variation (CV) of ratio of phosphopeptides. Only spectrum with iTRAQ reporter ion peak area  $\geq 25$  was quantifiable. C, Quantitative bias adjusted by phosphopeptide ratio of the standard bovine  $\alpha$  and  $\beta$  caseins. Only quantifiable spectra were used for calculation. D, Quantification accuracy and reproducibility of number of quantifiable spectra for a phosphopeptide according to MAE and CV of ratio of phosphopeptides. MSMS spectra for iTRAQ reporter ions with intensity  $\geq 25$ . Only quantifiable spectra were used for calculation.**

### Supplemental Figure 3

|                    | TAB10min/sham | TAB30min/sham | TAB60min/sham |
|--------------------|---------------|---------------|---------------|
| Exp. Set1 repeat 1 | 0.17          | 0.17          | 0.18          |
| Exp. Set1 repeat 2 | 0.23          | 0.25          | 0.2           |
| Exp. Set1 repeat 3 | 0.23          | 0.2           | 0.21          |

|                    | Hypertrophy1/sham1 | Hypertrophy2/sham1 | Sham2/sham1 |
|--------------------|--------------------|--------------------|-------------|
| Exp. Set2 repeat 1 | 0.2                | 0.21               | 0.25        |
| Exp. Set2 repeat 2 | 0.23               | 0.17               | 0.16        |

**Supplemental Figure 3. The CV of casein phosphopeptides in each experiment of Figure 1A as an index of the quantification reproducibility for each experimental operation.**

## Supplemental Figure 4

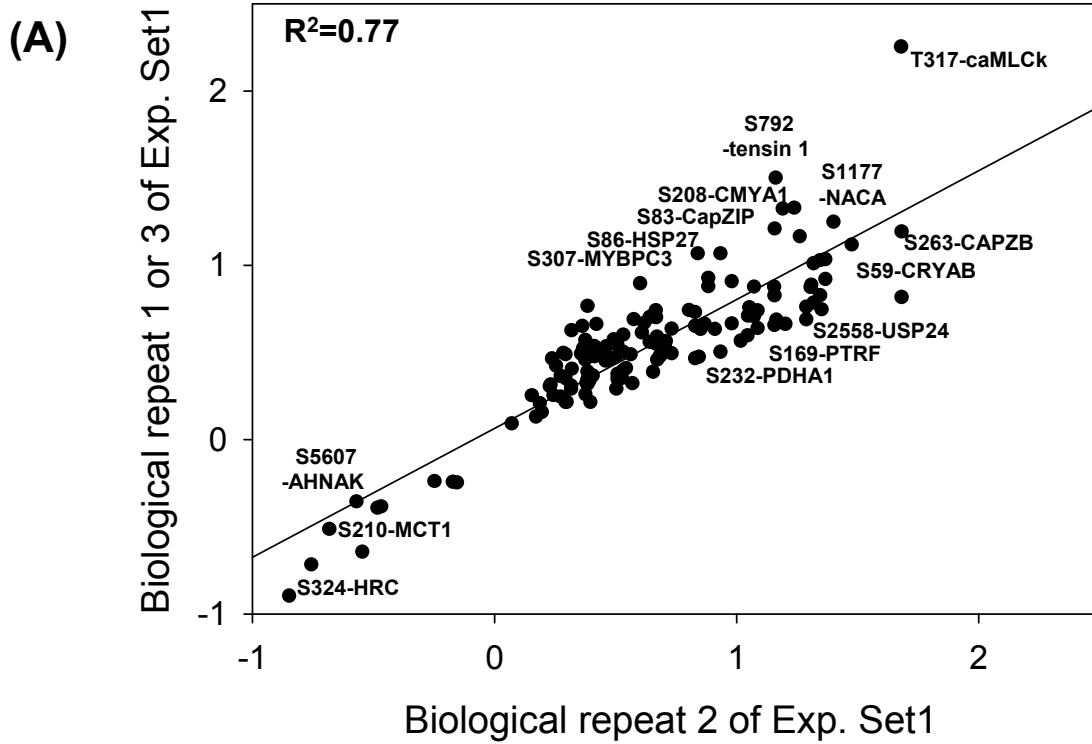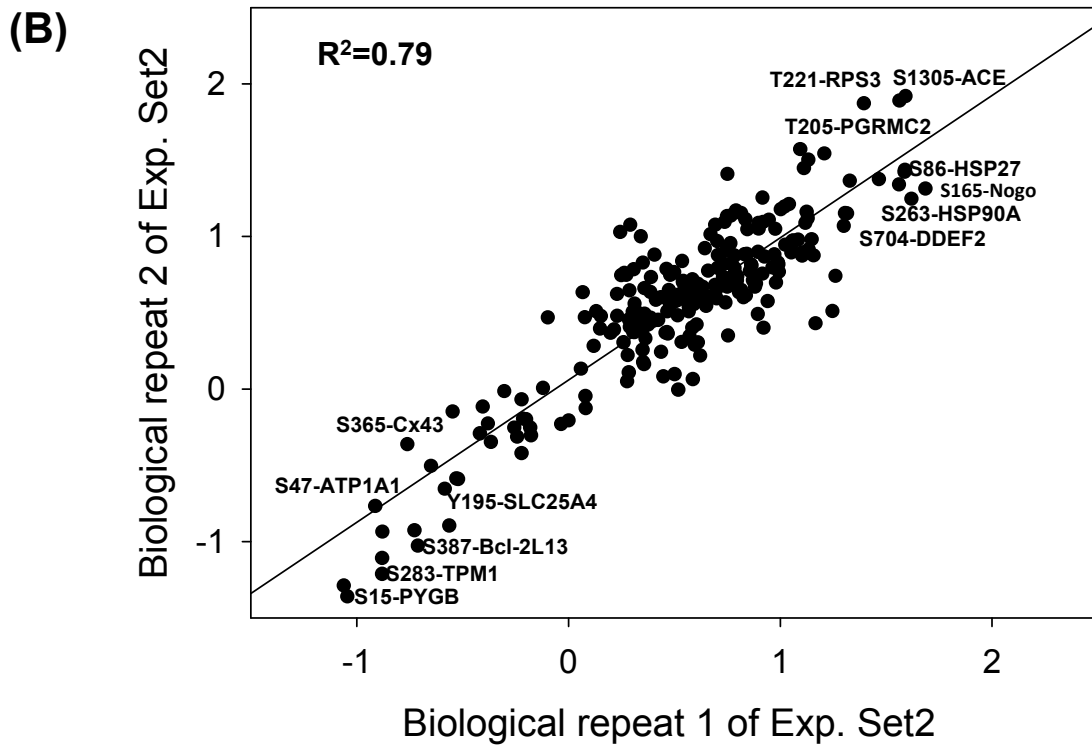

Supplemental Figure 4. (A) and (B) show correlation of ratios of biological significant changed phosphopeptides in acute pressure overload and hypertrophic hearts.

## Supplemental Figure 5

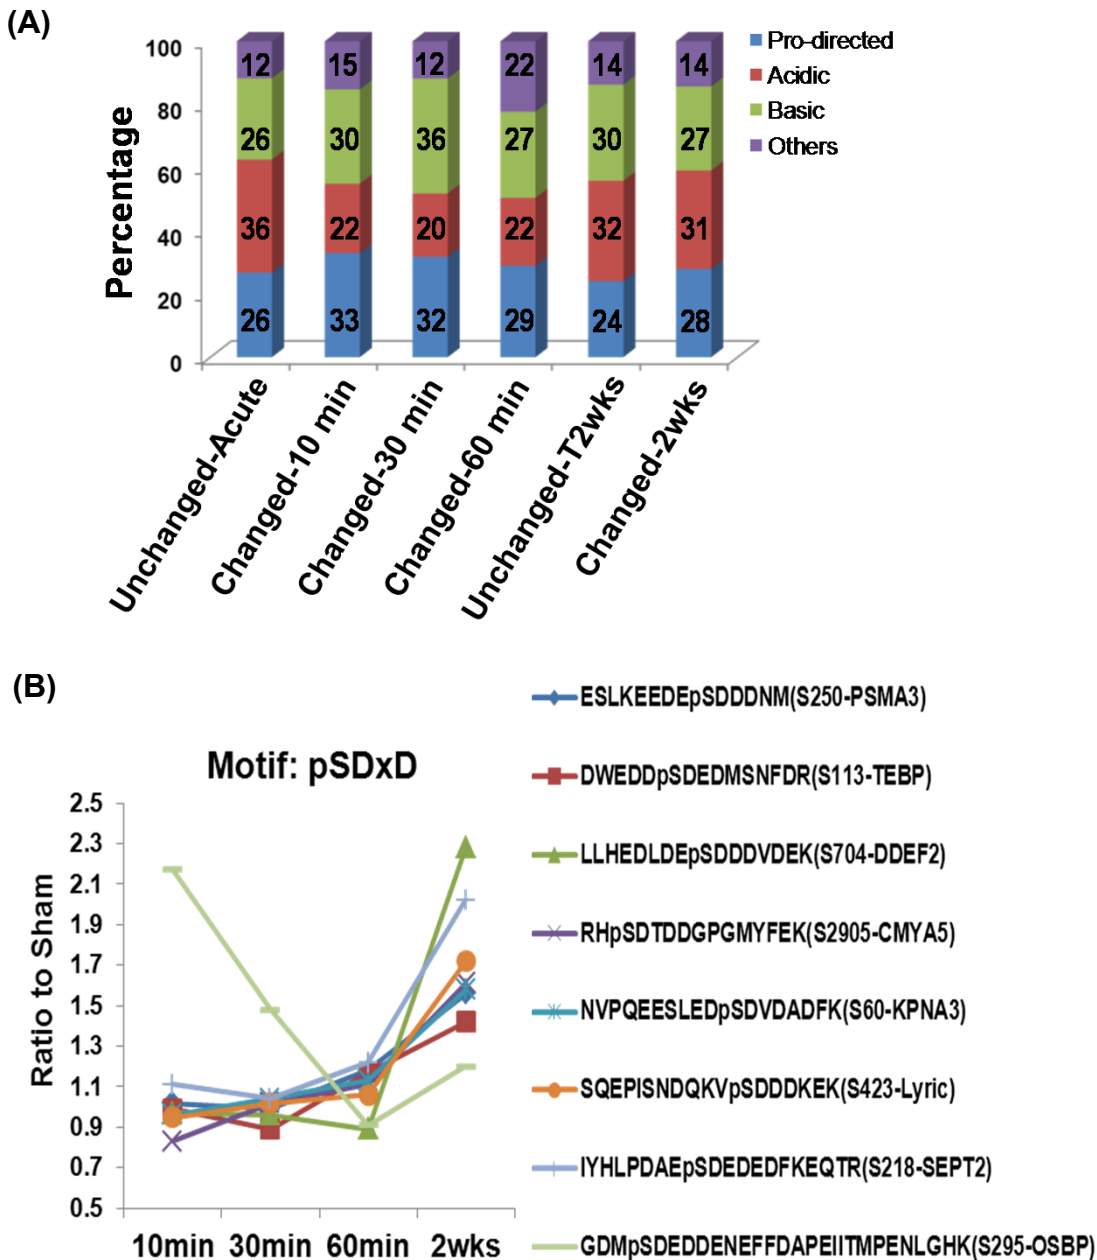

Supplemental Figure 5. Kinase recognition motif analysis. **A**, Percentage of phosphorylated amino acid sites with 3 general kinase recognition motifs at different times of TAB. The motif classes include proline-directed (Pro-directed), acidic, basic and others. Data are percentage of kinase recognition motifs in each group. **B**, Temporal pattern of pSDxD, a casein kinase II recognition motif, with TAB. pS, phosphoserine; D, aspartic acid; x, any amino acid residue. The sequences of quantified phosphopeptides are listed and the phosphorylated sites with protein names are in parentheses.

# Supplemental Figure 6

(A)

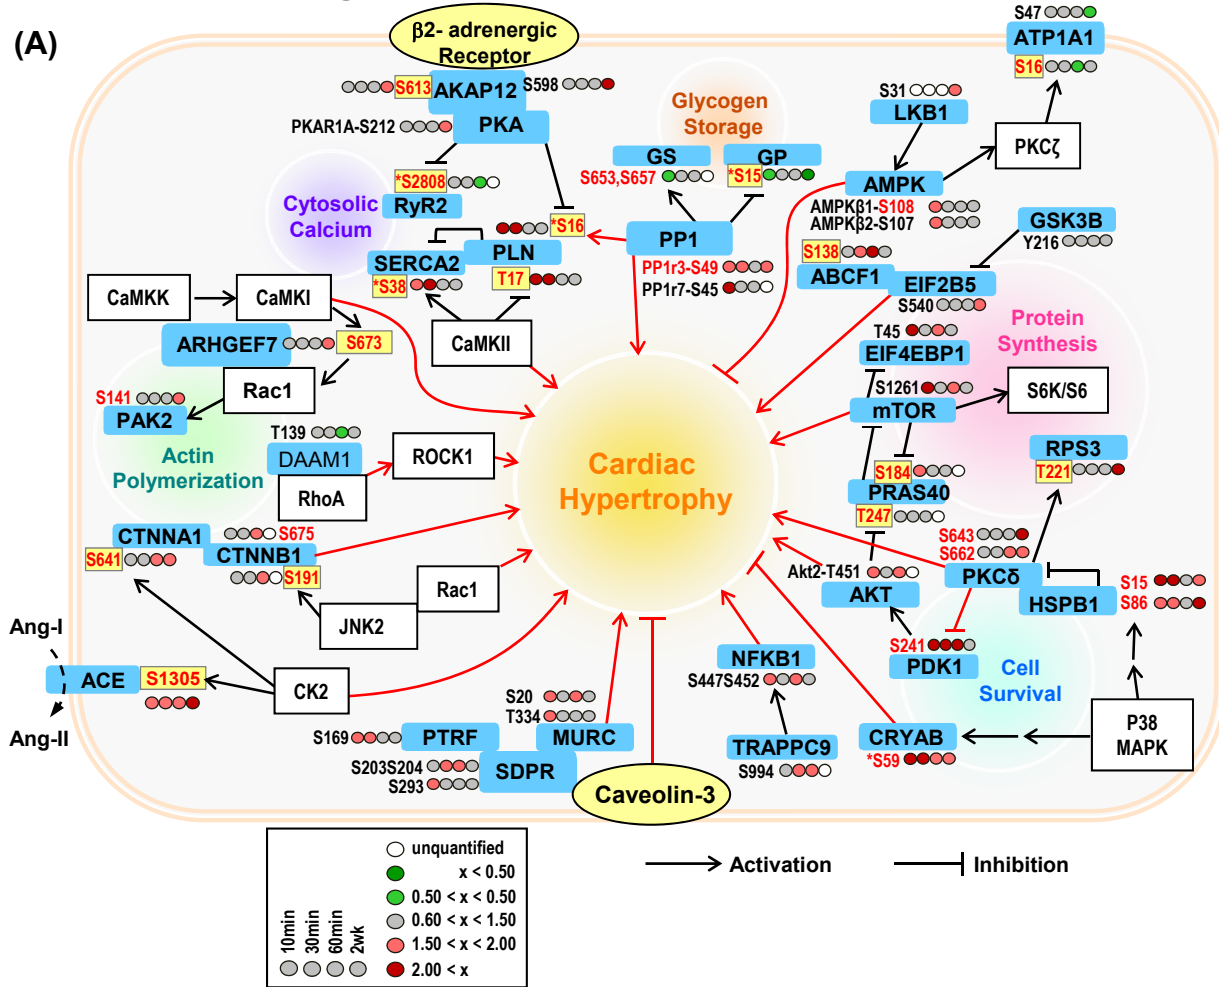

(B)

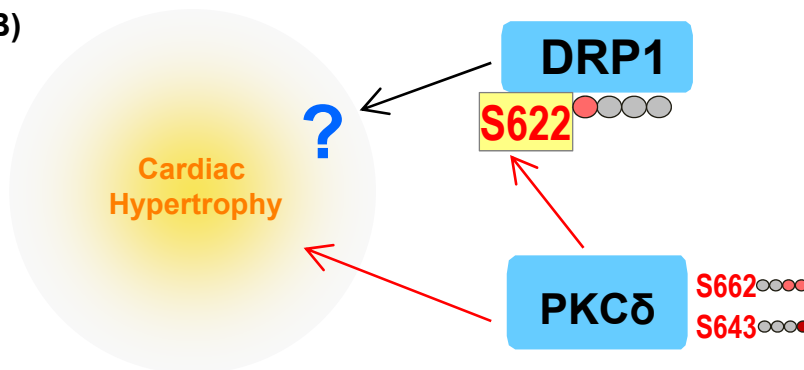

Supplemental Figure 6. A, Pressure-overload–induced dynamic phosphoproteomic alteration in pathways related to cardiac hypertrophy. The fold change in phosphorylation level of indicated amino acid sites at 4 TAB times are in the inset. Proteins with blue background were quantified. Red arrows indicate events occurring in mouse hearts or rat cardiomyocytes. Black arrows indicate events not demonstrated in hearts or cardiomyocytes. Symbols or colors on amino acids: \* known function of phosphorylation in cardiomyocytes; black, unknown effect of phosphorylation on proteins; red, known effect of phosphorylation on protein; rectangle box, amino acid sites are directly phosphorylated by the kinases upstream in this figure. B, DRP1 S622 is phosphorylated by prohypertrophic kinase PKC- $\delta$ . The role of DRP1 in cardiac hypertrophy was tested (Figure 3-5).

## Supplemental Table II

Supplemental Table II. References of signaling pathways of Supplemental Figure 6

| Classification       | Pathway                                          | Reference                                                                                                                                                                                                                                                                                 |
|----------------------|--------------------------------------------------|-------------------------------------------------------------------------------------------------------------------------------------------------------------------------------------------------------------------------------------------------------------------------------------------|
| Cytosolic calcium    | CaMKII=>S38 of SERCA                             | Toyofuku T, Curotto Kurzydowski K, Narayanan N, MacLennan DH. Identification of Ser38 as the site in cardiac sarcoplasmic reticulum Ca(2+)-ATPase that is phosphorylated by Ca2+/calmodulin-dependent protein kinase. <i>J Biol Chem.</i> 1994;269(42):26492-26496.                       |
| Cytosolic calcium    | PKA=>S2808 of RyR2                               | Shan J, Kushnir A, Betzenhauser MJ, Reiken S, Li J, Lehnart SE, Lindegger N, Mongillo M, Mohler PJ, Marks AR. Phosphorylation of the ryanodine receptor mediates the cardiac fight or flight response in mice. <i>J Clin Invest.</i> 120(12):4388-4398.                                   |
| Cytosolic calcium    | PP1=>S16 of PLN                                  | Carr AN, Schmidt AG, Suzuki Y, del Monte F, Sato Y, Lanner C, Breeden K, Jing SL, Allen PB, Greengard P, Yatani A, Hoit BD, Grupp IL, Hajjar RJ, DePaoli-Roach AA, Kranias EG. Type 1 phosphatase, a negative regulator of cardiac function. <i>Mol Cell Biol.</i> 2002;22(12):4124-4135. |
| Cytosolic calcium    | CaMKII=>T17 of PLN and PKA=>S16 of PLN           | Mattiazzi A, Mundina-Weilenmann C, Guoxiang C, Vittone L, Kranias E. Role of phospholamban phosphorylation on Thr17 in cardiac physiological and pathological conditions. <i>Cardiovasc Res.</i> 2005;68(3):366-375.                                                                      |
| Glycogen storage     | S49 of PP1r3=>S15 of GP and PP1=>GS1             | Dent P, Lavoigne A, Nakielny S, Caudwell FB, Watt P, Cohen P. The molecular mechanism by which insulin stimulates glycogen synthesis in mammalian skeletal muscle. <i>Nature.</i> 1990;348(6299):302-308.                                                                                 |
| Protein synthesis    | Akt=>T247 of PRAS40 => mTOR =>eIF4EBP and S6K/S6 | Vander Haar E, Lee SI, Bandhakavi S, Griffin TJ, Kim DH. Insulin signalling to mTOR mediated by the Akt/PKB substrate PRAS40. <i>Nat Cell Biol.</i> 2007;9(3):316-323.                                                                                                                    |
| Protein synthesis    | mTOR=>S184 of PRAS40                             | Wang L, Harris TE, Lawrence JC, Jr. Regulation of proline-rich Akt substrate of 40 kDa (PRAS40) function by mammalian target of rapamycin complex 1 (mTORC1)-mediated phosphorylation. <i>J Biol Chem.</i> 2008;283(23):15619-15627.                                                      |
| Protein synthesis    | PKC delta=>T221 of rpS3                          | Kim TS, Kim HD, Kim J. PKCdelta-dependent functional switch of rpS3 between translation and DNA repair. <i>Biochim Biophys Acta.</i> 2009;1793(2):395-405.                                                                                                                                |
| Protein synthesis    | ABCF1=>eIF2                                      | Paytubi S, Morrice NA, Boudeau J, Proud CG. The N-terminal region of ABC50 interacts with eukaryotic initiation factor eIF2 and is a target for regulatory phosphorylation by CK2. <i>Biochem J.</i> 2008;409(1):223-231.                                                                 |
| Protein synthesis    | Akt=>AMPK in heart                               | Kovacic S, Soltys CL, Barr AJ, Shiojima I, Walsh K, Dyck JR. Akt activity negatively regulates phosphorylation of AMP-activated protein kinase in the heart. <i>J Biol Chem.</i> 2003;278(41):39422-39427.                                                                                |
| Actin polymerization | CaMKK=>CaMKI=>S673 of Arhgef7=>Rac1=>PAK         | Saneyoshi T, Wayman G, Fortin D, Davare M, Hoshi N, Nozaki N, Natsume T, Soderling TR. Activity-dependent synaptogenesis: regulation by a CaM-kinase kinase/CaM-kinase I/betaPIX signaling complex. <i>Neuron.</i> 2008;57(1):94-107.                                                     |



**Supplemental Table II. Continued**

| Classification       | Pathway                                   | Reference                                                                                                                                                                                                                                                                                                   |
|----------------------|-------------------------------------------|-------------------------------------------------------------------------------------------------------------------------------------------------------------------------------------------------------------------------------------------------------------------------------------------------------------|
| Actin polymerization | Wnt=>DAAM1=>RhoA                          | Habas R, Kato Y, He X. Wnt/Frizzled activation of Rho regulates vertebrate gastrulation and requires a novel Formin homology protein Daam1. <i>Cell</i> . 2001;107(7):843-854                                                                                                                               |
| Actin polymerization | alpha Catenin=>actin-filament assembly    | Drees F, Pokutta S, Yamada S, Nelson WJ, Weis WI. Alpha-catenin is a molecular switch that binds E-cadherin-beta-catenin and regulates actin-filament assembly. <i>Cell</i> . 2005;123(5):903-915.                                                                                                          |
| Cell survival        | aAR=>PKCdelta=>PDK1=>Akt                  | Guo J, Sabri A, Elouardighi H, Rybin V, Steinberg SF. Alpha1-adrenergic receptors activate AKT via a Pyk2/PDK-1 pathway that is tonically inhibited by novel protein kinase C isoforms in cardiomyocytes. <i>Circ Res</i> . 2006;99(12):1367-1375.                                                          |
| Cell survival        | hspb1=>PKC delta                          | Lee YJ, Lee DH, Cho CK, Bae S, Jhon GJ, Lee SJ, Soh JW, Lee YS. HSP25 inhibits protein kinase C delta-mediated cell death through direct interaction. <i>J Biol Chem</i> . 2005;280(18):18108-18119.                                                                                                        |
| Cell survival        | p38 MAPK=>MAPKAPK2=>S59 of Crayab         | Morrison LE, Hoover HE, Thuerauf DJ, Glembotski CC. Mimicking phosphorylation of alphaB-crystallin on serine-59 is necessary and sufficient to provide maximal protection of cardiac myocytes from apoptosis. <i>Circ Res</i> . 2003;92(2):203-211.                                                         |
| Cardiac Hypertrophy  | PP1=>cardiac hypertrophy                  | Carr AN, Schmidt AG, Suzuki Y, del Monte F, Sato Y, Lanner C, Breeden K, Jing SL, Allen PB, Greengard P, Yatani A, Hoit BD, Grupp IL, Hajjar RJ, DePaoli-Roach AA, Kranias EG. Type 1 phosphatase, a negative regulator of cardiac function. <i>Mol Cell Biol</i> . 2002;22(12):4124-4135.                  |
| Cardiac Hypertrophy  | RhoA=> ROCK=>cardiac hypertrophy          | Higashi M, Shimokawa H, Hattori T, Hiroki J, Mukai Y, Morikawa K, Ichiki T, Takahashi S, Takeshita A. Long-term inhibition of Rho-kinase suppresses angiotensin II-induced cardiovascular hypertrophy in rats in vivo: effect on endothelial NAD(P)H oxidase system. <i>Circ Res</i> . 2003;93(8):767-775.  |
| Cardiac Hypertrophy  | Rac=>cardiac hypertrophy                  | Pracyk JB, Tanaka K, Hegland DD, Kim KS, Sethi R, Rovira, II, Blazina DR, Lee L, Bruder JT, Kovessdi I, Goldshmidt-Clermont PJ, Irani K, Finkel T. A requirement for the rac1 GTPase in the signal transduction pathway leading to cardiac myocyte hypertrophy. <i>J Clin Invest</i> . 1998;102(5):929-937. |
| Cardiac Hypertrophy  | mTOR=>cardiac hypertrophy                 | Shioi T, McMullen JR, Tarnavski O, Converso K, Sherwood MC, Manning WJ, Izumo S. Rapamycin attenuates load-induced cardiac hypertrophy in mice. <i>Circulation</i> . 2003;107(12):1664-1670.                                                                                                                |
| Cardiac Hypertrophy  | AMPK=>mTOR/S6K/S6 and cardiac hypertrophy | Dolinsky VW, Chan AY, Robillard Frayne I, Light PE, Des Rosiers C, Dyck JR. Resveratrol prevents the prohypertrophic effects of oxidative stress on LKB1. <i>Circulation</i> . 2009;119(12):1643-1652.                                                                                                      |
| Cardiac hypertrophy  | NFkB=>cardiac hypertrophy                 | Gupta S, Purcell NH, Lin A, Sen S. Activation of nuclear factor-kappaB is necessary for myotrophin-induced cardiac hypertrophy. <i>J Cell Biol</i> . 2002;159(6):1019-1028.                                                                                                                                 |
| Cardiac hypertrophy  | PKC delta=>cardiac hypertrophy            | Chen L, Hahn H, Wu G, Chen CH, Liron T, Schechtman D, Cavallaro G, Banci L, Guo Y, Bolli R, Dorn GW, 2nd, Mochly-Rosen D. Opposing cardioprotective actions and parallel hypertrophic effects of delta PKC and epsilon PKC. <i>Proc Natl Acad Sci U S A</i> . 2001;98(20):11114-11119.                      |

**Supplemental Table II. Continued**

| Classification      | Pathway                                 | Reference                                                                                                                                                                                                                                                                                                        |
|---------------------|-----------------------------------------|------------------------------------------------------------------------------------------------------------------------------------------------------------------------------------------------------------------------------------------------------------------------------------------------------------------|
| Cardiac hypertrophy | Cryab=>cardiac hypertrophy              | Kumarapeli AR, Su H, Huang W, Tang M, Zheng H, Horak KM, Li M, Wang X. Alpha B-crystallin suppresses pressure overload cardiac hypertrophy. <i>Circ Res.</i> 2008;103(12):1473-1482.                                                                                                                             |
| Cardiac hypertrophy | CaMKI=>cardiac hypertrophy              | Passier R, Zeng H, Frey N, Naya FJ, Nicol RL, McKinsey TA, Overbeek P, Richardson JA, Grant SR, Olson EN. CaM kinase signaling induces cardiac hypertrophy and activates the MEF2 transcription factor in vivo. <i>J Clin Invest.</i> 2000;105(10):1395-1406                                                     |
| Cardiac hypertrophy | CaMKII=>cardiac hypertrophy             | Kato T, Sano M, Miyoshi S, Sato T, Hakuno D, Ishida H, Kinoshita-Nakazawa H, Fukuda K, Ogawa S. Calmodulin kinases II and IV and calcineurin are involved in leukemia inhibitory factor-induced cardiac hypertrophy in rats. <i>Circ Res.</i> 2000;87(10):937-945.                                               |
| Cardiac hypertrophy | Caveolin3=>cardiac hypertrophy          | Koga A, Oka N, Kikuchi T, Miyazaki H, Kato S, Imaizumi T. Adenovirus-mediated overexpression of caveolin-3 inhibits rat cardiomyocyte hypertrophy. <i>Hypertension.</i> 2003;42(2):213-219.                                                                                                                      |
| Cardiac hypertrophy | Murc=>cardiac hypertrophy               | Ogata T, Ueyama T, Isodono K, Tagawa M, Takehara N, Kawashima T, Harada K, Takahashi T, Shioi T, Matsubara H, Oh H. MURC, a muscle-restricted coiled-coil protein that modulates the Rho/ROCK pathway, induces cardiac dysfunction and conduction disturbance. <i>Mol Cell Biol.</i> 2008;28(10):3424-3436.      |
| Cardiac hypertrophy | GSK3beat=>eIF2B5=>cardiac hypertrophy   | Hardt SE, Tomita H, Katus HA, Sadoshima J. Phosphorylation of eukaryotic translation initiation factor 2Bepsilon by glycogen synthase kinase-3beta regulates beta-adrenergic cardiac myocyte hypertrophy. <i>Circ Res.</i> 2004;94(7):926-935.                                                                   |
| Others              | Wnt=>Rac1=>JNK2=>S191 of beta catenin   | Wu X, Tu X, Joeng KS, Hilton MJ, Williams DA, Long F. Rac1 activation controls nuclear localization of beta-catenin during canonical Wnt signaling. <i>Cell.</i> 2008;133(2):340-353.                                                                                                                            |
| Others              | CK2=>S641of alpha catenin=>beta catenin | Ji H, Wang J, Nika H, Hawke D, Keezer S, Ge Q, Fang B, Fang X, Fang D, Litchfield DW, Aldape K, Lu Z. EGF-induced ERK activation promotes CK2-mediated disassociation of alpha-Catenin from beta-Catenin and transactivation of beta-Catenin. <i>Mol Cell.</i> 2009;36(4):547-559.                               |
| Others              | CK2=>S1305 of ACE=>JNK                  | Kohlstedt K, Brandes RP, Muller-Esterl W, Busse R, Fleming I. Angiotensin-converting enzyme is involved in outside-in signaling in endothelial cells. <i>Circ Res.</i> 2004;94(1):60-67.                                                                                                                         |
| Others              | AMPK=>PKCζ=>S16 of ATP1a1               | Vadasz I, Dada LA, Briva A, Trejo HE, Welch LC, Chen J, Toth PT, Lecuona E, Witters LA, Schumacker PT, Chandel NS, Seeger W, Sznajder JI. AMP-activated protein kinase regulates CO2-induced alveolar epithelial dysfunction in rats and human cells by promoting Na,K-ATPase endocytosis. <i>J Clin Invest.</i> |
| Others              | beta2AR=>PKA=>S613 of AKAP12            | Tao J, Wang HY, Malbon CC. Protein kinase A regulates AKAP250 (gravin) scaffold binding to the beta2-adrenergic receptor. <i>EMBO J.</i> 2003;22(24):6419-6429.                                                                                                                                                  |
| Others              | Trappc9=>NFκB                           | Hu WH, Pendergast JS, Mo XM, Brambilla R, Bracchi-Ricard V, Li F, Walters WM, Blits B, He L, Schaal SM, Bethea JR. NIBP, a novel NIK and IKK(beta)-binding protein that enhances NF-(kappa)B activation. <i>J Biol Chem.</i> 2005;280(32):29233-29241.                                                           |

## Supplemental Table III

Supplemental Table III. TAB-phosphoprotein-related abnormal heart phenotypes

| Quantified |      | Phosphosite Ratio<br>>1.5 change |      | Gene<br>Symbol | Mammalian Phenotype Term                                                                                                                                                                                                                                                                                                                             |
|------------|------|----------------------------------|------|----------------|------------------------------------------------------------------------------------------------------------------------------------------------------------------------------------------------------------------------------------------------------------------------------------------------------------------------------------------------------|
| Acute      | 2wks | Acute                            | 2wks |                |                                                                                                                                                                                                                                                                                                                                                      |
| v          | v    | v                                |      | Acacb          | small heart                                                                                                                                                                                                                                                                                                                                          |
| v          | v    | v                                |      | Acadl          | abnormal heart morphology                                                                                                                                                                                                                                                                                                                            |
| v          | v    | v                                | v    | Ace            | decreased heart rate,decreased heart weight,dilated heart,enlarged heart atrium,increased heart rate,increased heart weight                                                                                                                                                                                                                          |
| v          |      |                                  |      | Actc1          | abnormal heart development,dilated heart right ventricle,enlarged heart,heart left ventricle hypertrophy                                                                                                                                                                                                                                             |
| v          | v    |                                  |      | Ak1            | altered response to myocardial infarction                                                                                                                                                                                                                                                                                                            |
| v          | v    |                                  | v    | Akap12         | enlarged heart                                                                                                                                                                                                                                                                                                                                       |
| v          | v    |                                  |      | Ank1           | enlarged heart                                                                                                                                                                                                                                                                                                                                       |
| v          | v    | v                                |      | Ank2           | increased heart rate variability                                                                                                                                                                                                                                                                                                                     |
| v          | v    |                                  |      | Atp1a1         | decreased cardiac muscle contractility,increased cardiac muscle contractility                                                                                                                                                                                                                                                                        |
| v          | v    | v                                |      | Atp2a2         | abnormal heart left atrium morphology,abnormal heart left ventricle pressure,abnormal heart shape,congestive heart failure,decreased heart rate,dilated heart atrium,dilated heart left ventricle,dilated heart right ventricle,enlarged heart,heart left ventricle hypertrophy,increased heart weight,increased response of heart to induced stress |
| v          | v    | v                                | v    | Bag3           | increased cardiomyocyte apoptosis,myocardial fiber degeneration                                                                                                                                                                                                                                                                                      |
| v          |      | v                                |      | Bnip3          | altered response of heart to induced stress                                                                                                                                                                                                                                                                                                          |
| v          |      |                                  |      | Cacna1c        | congestive heart failure,decreased heart rate,dilated heart ventricle,heart right ventricle hypertrophy,increased heart weight,irregular heartbeat                                                                                                                                                                                                   |
| v          | v    | v                                | v    | Ckm            | dilated heart left ventricle,heart left ventricle hypertrophy                                                                                                                                                                                                                                                                                        |
| v          | v    | v                                | v    | Ckmt2          | dilated heart left ventricle,heart left ventricle hypertrophy                                                                                                                                                                                                                                                                                        |

**Supplemental Table III. Continued**

| Quantified |      | Phosphosite Ratio<br>>1.5 change |      | Gene<br>Symbol | Mammalian Phenotype Term                                                                                                                                                                                                                                                                                                                                                                                                                                                                   |
|------------|------|----------------------------------|------|----------------|--------------------------------------------------------------------------------------------------------------------------------------------------------------------------------------------------------------------------------------------------------------------------------------------------------------------------------------------------------------------------------------------------------------------------------------------------------------------------------------------|
| Acute      | 2wks | Acute                            | 2wks |                |                                                                                                                                                                                                                                                                                                                                                                                                                                                                                            |
|            | v    |                                  | v    | Csrp3          | abnormal myocardial fiber morphology,cardiac fibrosis,cardiac hypertrophy,cardiac interstitial fibrosis,cardiomyopathy,decreased cardiac muscle contractility,dilated cardiomyopathy,enlarged myocardial fiber,increased cardiac muscle contractility,abnormal heart morphology,abnormal heart septum morphology,abnormal heart ventricle morphology,decreased heart rate,decreased response of heart to induced stress,dilated heart left ventricle,enlarged heart,increased heart weight |
| v          | v    | v                                | v    | Ctnnb1         | decreased response of heart to induced stress,small heart                                                                                                                                                                                                                                                                                                                                                                                                                                  |
| v          |      | v                                |      | Daam1          | abnormal heart left ventricle morphology,abnormal heart ventricle morphology                                                                                                                                                                                                                                                                                                                                                                                                               |
| v          | v    | v                                |      | Dag1           | abnormal cardiac muscle contractility,cardiac fibrosis,dilated cardiomyopathy,myocardial fiber degeneration                                                                                                                                                                                                                                                                                                                                                                                |
| v          |      | v                                |      | Dnm1l          | abnormal heart development,abnormal heart morphology,abnormal heart ventricle pressure,congestive heart failure,dilated heart                                                                                                                                                                                                                                                                                                                                                              |
|            | v    |                                  | v    | Dtna           | cardiac fibrosis,cardiomyopathy,myocardial fiber degeneration                                                                                                                                                                                                                                                                                                                                                                                                                              |
| v          | v    | v                                |      | Flna           | abnormal heart morphology,decreased heart right ventricle size,dilated heart                                                                                                                                                                                                                                                                                                                                                                                                               |
| v          |      |                                  |      | Fxr1           | small heart                                                                                                                                                                                                                                                                                                                                                                                                                                                                                |
|            | v    |                                  |      | Gab1           | abnormal cardiac muscle relaxation,abnormal cardiovascular system morphology,abnormal endocardium morphology,decreased cardiac muscle contractility,hemopericardium,abnormal heart left ventricle morphology,abnormal heart morphology,congestive heart failure,dilated heart,dilated heart left ventricle,dilated heart right ventricle,increased heart weight                                                                                                                            |

**Supplemental Table III. Continued**

| Quantified |      | Phosphosite Ratio<br>>1.5 change |      | Gene<br>Symbol | Mammalian Phenotype Term                                                                                                                                                                                                                                                                                                                                                                                                                                                                         |
|------------|------|----------------------------------|------|----------------|--------------------------------------------------------------------------------------------------------------------------------------------------------------------------------------------------------------------------------------------------------------------------------------------------------------------------------------------------------------------------------------------------------------------------------------------------------------------------------------------------|
| Acute      | 2wks | Acute                            | 2wks |                |                                                                                                                                                                                                                                                                                                                                                                                                                                                                                                  |
| v          |      | v                                |      | Gja1           | abnormal heart development,abnormal heart electrocardiography waveform feature,abnormal heart morphology,abnormal heart rate,abnormal heart right ventricle morphology,abnormal heart right ventricle outflow tract morphology,abnormal heart shape,abnormal heart ventricle morphology,decreased heart rate,dilated heart left ventricle,heart inflammation,heart right ventricle hypertrophy,heart right ventricle outflow tract stenosis,increased heart rate,irregular heartbeat,small heart |
| v          |      |                                  |      | Gtf2i          | failure of heart looping                                                                                                                                                                                                                                                                                                                                                                                                                                                                         |
| v          | v    | v                                |      | Hadha          | abnormal myocardium layer morphology                                                                                                                                                                                                                                                                                                                                                                                                                                                             |
| v          | v    | v                                | v    | Hrc            | increased response of heart to induced stress                                                                                                                                                                                                                                                                                                                                                                                                                                                    |
| v          | v    |                                  |      | Hsp90ab1       | absent heartbeat                                                                                                                                                                                                                                                                                                                                                                                                                                                                                 |
| v          | v    |                                  |      | Huwe1          | enlarged heart,small heart                                                                                                                                                                                                                                                                                                                                                                                                                                                                       |
| v          | v    | v                                |      | Igf2r          | congestive heart failure,dilated heart left ventricle,dilated heart right ventricle,enlarged heart,heart hyperplasia,increased heart right ventricle size,increased heart weight                                                                                                                                                                                                                                                                                                                 |
|            | v    |                                  | v    | Ivns1abp       | decreased cardiac muscle contractility,increased cardiomyocyte apoptosis                                                                                                                                                                                                                                                                                                                                                                                                                         |
| v          | v    | v                                |      | Jph2           | irregular heartbeat                                                                                                                                                                                                                                                                                                                                                                                                                                                                              |
| v          | v    | v                                | v    | Jup            | abnormal heart atrium morphology,abnormal heart development,abnormal heart electrocardiography waveform feature,abnormal heart morphology,abnormal heart right ventricle morphology,abnormal heart ventricle morphology,dilated heart,dilated heart left ventricle,dilated heart right ventricle,enlarged heart,enlarged heart right atrium,heart inflammation,heart left ventricle hypertrophy,increased heart left ventricle size increased heart rate increased                               |

**Supplemental Table III. Continued**

| Quantified |      | Phosphosite Ratio<br>>1.5 change |      | Gene<br>Symbol | Mammalian Phenotype Term                                                                                                                                                                                                                                                                                                                                                                           |
|------------|------|----------------------------------|------|----------------|----------------------------------------------------------------------------------------------------------------------------------------------------------------------------------------------------------------------------------------------------------------------------------------------------------------------------------------------------------------------------------------------------|
| Acute      | 2wks | Acute                            | 2wks |                |                                                                                                                                                                                                                                                                                                                                                                                                    |
| v          | v    | v                                |      | Ldb3           | abnormal heart left ventricle morphology,abnormal heart morphology,abnormal heart right ventricle morphology,abnormal heart ventricle morphology,dilated heart left ventricle,dilated heart right ventricle,enlarged heart,heart vascular congestion,increased heart left ventricle size,increased heart right ventricle size,increased heart weight,increased response of heart to induced stress |
| v          | v    |                                  |      | Map3k5         | decreased response of heart to induced stress                                                                                                                                                                                                                                                                                                                                                      |
| v          | v    |                                  |      | Mb             | abnormal heart morphology,congestive heart failure,heart left ventricle hypertrophy                                                                                                                                                                                                                                                                                                                |
| v          | v    | v                                |      | Mybpc3         | abnormal heart left ventricle morphology,abnormal heart morphology,dilated heart left atrium,dilated heart left ventricle,enlarged heart,heart left ventricle hypertrophy,increased heart weight,dilated heart left ventricle                                                                                                                                                                      |
| v          |      |                                  |      | Myh11          | dilated heart left ventricle                                                                                                                                                                                                                                                                                                                                                                       |
| v          |      | v                                |      | Myh6           | abnormal heart atrium morphology,abnormal heart left ventricle morphology,abnormal heart morphology,abnormal heart ventricle morphology,abnormal heart ventricle pressure,dilated heart atrium,dilated heart left ventricle,heart left ventricle hypertrophy,irregular heartbeat                                                                                                                   |

**Supplemental Table III. Continued**

| Quantified |      | Phosphosite Ratio<br>>1.5 change |      | Gene<br>Symbol | Mammalian Phenotype Term                                                                                                                                                                                                                                                                                                                                                                                                                                                                                                                                                                                                                                 |
|------------|------|----------------------------------|------|----------------|----------------------------------------------------------------------------------------------------------------------------------------------------------------------------------------------------------------------------------------------------------------------------------------------------------------------------------------------------------------------------------------------------------------------------------------------------------------------------------------------------------------------------------------------------------------------------------------------------------------------------------------------------------|
| Acute      | 2wks | Acute                            | 2wks |                |                                                                                                                                                                                                                                                                                                                                                                                                                                                                                                                                                                                                                                                          |
| v          |      | v                                |      | My12           | abnormal heart development,abnormal heart left ventricle morphology,abnormal heart left ventricle pressure,abnormal heart morphology,abnormal heart right ventricle morphology,abnormal heart shape,abnormal heart ventricle morphology,congestive heart failure,decreased heart rate,decreased response of heart to induced stress,dilated heart,dilated heart atrium,dilated heart left ventricle,dilated heart right ventricle,dilated heart ventricle,enlarged heart,enlarged heart atrium,heart block,heart hypoplasia,increased heart left ventricle size,increased heart weight,increased response of heart to induced stress,irregular heartbeat |
| v          | v    | v                                |      | My13           | abnormal heart left ventricle morphology,heart left ventricle hypertrophy,heart right ventricle hypertrophy,increased heart weight                                                                                                                                                                                                                                                                                                                                                                                                                                                                                                                       |
| v          | v    | v                                | v    | Naca           | abnormal heart ventricle morphology                                                                                                                                                                                                                                                                                                                                                                                                                                                                                                                                                                                                                      |
| v          |      |                                  |      | Nos3           | abnormal heart left ventricle morphology,abnormal heart morphology,abnormal heart right ventricle pressure,abnormal heart weight,congestive heart failure,decreased heart rate,dilated heart left ventricle,enlarged heart,enlarged heart atrium,heart left ventricle hypertrophy,increased heart left ventricle size,increased heart rate,increased heart right ventricle size,increased heart ventricle size,increased heart weight                                                                                                                                                                                                                    |
| v          | v    | v                                | v    | Pdha1          | abnormal heart left ventricle morphology,heart left ventricle hypertrophy,increased heart weight                                                                                                                                                                                                                                                                                                                                                                                                                                                                                                                                                         |

**Supplemental Table III. Continued**

| Quantified |      | Phosphosite Ratio<br>>1.5 change |      | Gene<br>Symbol | Mammalian Phenotype Term                                                                                                                                                                                                                                                                                                                                                                                                |
|------------|------|----------------------------------|------|----------------|-------------------------------------------------------------------------------------------------------------------------------------------------------------------------------------------------------------------------------------------------------------------------------------------------------------------------------------------------------------------------------------------------------------------------|
| Acute      | 2wks | Acute                            | 2wks |                |                                                                                                                                                                                                                                                                                                                                                                                                                         |
| v          | v    | v                                |      | Pdpk1          | abnormal cardiovascular system morphology,abnormal cardiovascular system physiology,abnormal myocardial fiber morphology,decreased cardiac muscle contractility,dilated cardiomyopathy,myocardium hypoplasia,abnormal heart morphology,abnormal heart right ventricle morphology,abnormal heart tube morphology,abnormal heart ventricle morphology,enlarged heart atrium,heart right ventricle hypertrophy,small heart |
| v          |      | v                                |      | Pds5b          | abnormal heart morphology,dilated heart atrium                                                                                                                                                                                                                                                                                                                                                                          |
| v          | v    | v                                |      | Plin5          | abnormal heart ventricle morphology                                                                                                                                                                                                                                                                                                                                                                                     |
| v          | v    | v                                |      | Pln            | abnormal heart left ventricle pressure,abnormal heart shape,congestive heart failure,decreased heart rate,increased heart weight                                                                                                                                                                                                                                                                                        |
| v          |      |                                  |      | Popdc2         | altered response of heart to induced stress                                                                                                                                                                                                                                                                                                                                                                             |
| v          | v    |                                  |      | Prkaca         | pericardial edema                                                                                                                                                                                                                                                                                                                                                                                                       |
| v          | v    |                                  |      | Prkar1a        | abnormal heart development,abnormal heart tube morphology,decreased heart rate variability                                                                                                                                                                                                                                                                                                                              |
|            | v    |                                  |      | Prkca          | decreased response of heart to induced stress,dilated heart left ventricle                                                                                                                                                                                                                                                                                                                                              |
| v          | v    | v                                | v    | Prkcd          | abnormal cardiovascular system physiology                                                                                                                                                                                                                                                                                                                                                                               |
| v          |      |                                  |      | Ptpn12         | abnormal heart development                                                                                                                                                                                                                                                                                                                                                                                              |
| v          |      |                                  |      | Rasip1         | abnormal cardiovascular development,abnormal endocardium morphology                                                                                                                                                                                                                                                                                                                                                     |
| v          | v    | v                                |      | Ryr2           | abnormal heartbeat,abnormal heart morphology,altered response of heart to induced stress,decreased heart rate,enlarged heart,heart left ventricle hypertrophy,increased response of heart to induced stress,irregular heartbeat                                                                                                                                                                                         |
| v          |      | v                                |      | Sgca           | abnormal heart left ventricle morphology,heart inflammation                                                                                                                                                                                                                                                                                                                                                             |



**Supplemental Table III. Continued**

| Quantified |      | Phosphosite Ratio<br>>1.5 change |      | Gene<br>Symbol | Mammalian Phenotype Term                                                                                                                                                                                                                     |
|------------|------|----------------------------------|------|----------------|----------------------------------------------------------------------------------------------------------------------------------------------------------------------------------------------------------------------------------------------|
| Acute      | 2wks | Acute                            | 2wks |                |                                                                                                                                                                                                                                              |
| v          | v    |                                  | v    | Slc25a4        | increased heart weight                                                                                                                                                                                                                       |
| v          | v    | v                                |      | Slc2a4         | abnormal heart morphology,heart inflammation,increased heart weight                                                                                                                                                                          |
| v          | v    |                                  |      | Slc4a3         | abnormal heart rate,congestive heart failure,decreased heart rate                                                                                                                                                                            |
| v          | v    |                                  |      | Slc8a1         | abnormal heart atrium morphology,abnormal heart development,abnormal heart morphology,abnormal heart tube morphology,absent heartbeat,decreased heart rate,enlarged heart,heart left ventricle hypertrophy,irregular heartbeat               |
| v          |      | v                                |      | Speg           | dilated heart,dilated heart left atrium,dilated heart right atrium,dilated heart ventricle,enlarged heart,increased heart weight                                                                                                             |
| v          | v    |                                  | v    | Sptan1         | abnormal heart shape,dilated heart                                                                                                                                                                                                           |
| v          | v    | v                                | v    | Sptbn1         | abnormal heart ventricle morphology,enlarged heart                                                                                                                                                                                           |
| v          | v    |                                  |      | Srf            | abnormal heart shape,abnormal heart ventricle morphology,irregular heartbeat                                                                                                                                                                 |
|            | v    |                                  |      | Srl            | abnormal cardiac muscle relaxation,abnormal cardiovascular system physiology,decreased cardiac muscle contractility                                                                                                                          |
| v          |      | v                                |      | Sfrs2          | cardiac interstitial fibrosis,dilated cardiomyopathy                                                                                                                                                                                         |
| v          |      | v                                |      | Syne1          | decreased heart rate                                                                                                                                                                                                                         |
|            | v    |                                  |      | Tcea1          | pericardial edema                                                                                                                                                                                                                            |
| v          |      |                                  |      | Tnni3          | congestive heart failure,increased heart weight                                                                                                                                                                                              |
| v          |      |                                  |      | Tnnt2          | abnormal heart development,abnormal heart electrocardiography waveform feature,abnormal heart left ventricle morphology,absent heartbeat,congestive heart failure,dilated heart,enlarged heart,failure of heart looping,increased heart rate |

**Supplemental Table III. Continued**

| Quantified |      | Phosphosite Ratio<br>>1.5 change |      | Gene<br>Symbol | Mammalian Phenotype Term                                                                                                                                                                                                                                                        |
|------------|------|----------------------------------|------|----------------|---------------------------------------------------------------------------------------------------------------------------------------------------------------------------------------------------------------------------------------------------------------------------------|
| Acute      | 2wks | Acute                            | 2wks |                |                                                                                                                                                                                                                                                                                 |
| v          | v    | v                                | v    | Tpm1           | increased heart weight                                                                                                                                                                                                                                                          |
| v          |      |                                  |      | Tsc2           | abnormal heart ventricle morphology,heart hyperplasia                                                                                                                                                                                                                           |
| v          | v    | v                                | v    | Ttn            | abnormal heart development,abnormal heart left ventricle morphology,abnormal heart ventricle morphology,absent heartbeat,decreased heart weight,dilated heart left ventricle,heart left ventricle hypertrophy,increased heart left ventricle size                               |
| v          | v    |                                  | v    | Utrn           | cardiomyopathy,myocardial necrosis                                                                                                                                                                                                                                              |
| v          |      | v                                |      | Vac14          | abnormal heart atrium morphology                                                                                                                                                                                                                                                |
| v          | v    | v                                | v    | Vcl            | abnormal heart development,abnormal heart electrocardiography waveform feature,abnormal heart position or orientation,abnormal heart valve morphology,congestive heart failure,dilated heart left ventricle,heart block,increased heart weight,irregular heartbeat,small heart  |
| v          |      |                                  |      | Wnk1           | heart hemorrhage,heart hypoplasia                                                                                                                                                                                                                                               |
| v          | v    | v                                |      | Xirp1          | abnormal cardiac muscle contractility,abnormal cardiovascular system morphology,abnormal cardiovascular system physiology,abnormal myocardial fiber morphology,abnormal myocardium layer morphology,cardiac fibrosis,cardiac hypertrophy,decreased cardiac muscle contractility |
| v          | v    |                                  | v    | Zranb2         | decreased heart rate                                                                                                                                                                                                                                                            |
